## Unilateral multicystic dysplastic kidney: a meta-analysis of observational studies on the incidence, associated urinary tract malformations and the contralateral kidney

Michiel F. Schreuder<sup>1</sup>, Rik Westland<sup>2</sup> and Joanna A. E. van Wijk<sup>2</sup>

<sup>1</sup>Department of Pediatric Nephrology, Radboud University Nijmegen Medical Centre and <sup>2</sup>Department of Pediatric Nephrology, VU University Medical Center, Amsterdam, The Netherlands

Correspondence and offprint requests to: Michiel F. Schreuder; E-mail: m.schreuder@cukz.umcn.nl

### Abstract

**Background.** Many papers are published on cohorts with unilateral multicystic dysplastic kidney (MCDK) patients, but show variable results as to the incidence of associated urinary tract abnormalities. The objective of this study was to describe the status of the urinary tract, including contralateral hypertrophy and malformations, in patients with unilateral MCDK based on a meta-analysis of the literature, taking into account the timing of diagnosis (pre- versus postnatal) as a possible source of bias.

**Methods.** A systematic review of the scientific literature in English was conducted using PubMed and Embase. A meta-analysis was performed with the studies that were identified using our reproducible search.

**Results.** Based on analysis of the data in 19 populations, the overall incidence of unilateral MCDK is 1 in 4300 with an increasing trend over the years. A total of 67 cohorts with over 3500 patients with unilateral MCDK were included in the meta-analysis. Fifty-nine percent of patients were male and the MCDKs were significantly more often found on the left side (53.1%). Associated anomalies in the solitary functioning kidney were found in 1 in 3 patients, mainly vesicoureteric reflux (VUR, in 19.7%). In patients with VUR, 40% have severe contralateral VUR, defined as grade III–V. Contralateral hypertrophy, present in 77% of patients after a follow-up of at least 10 years, showed a trend to be less pronounced in patients with VUR. Timing of the diagnosis of MCDK did not essentially influence the results.

**Conclusions.** These aggregate results provide insight into the incidence, demographic data and associated anomalies in patients with unilateral MCDK. One in three patients with unilateral MCDK show anomalies in the contralateral, solitary functioning kidney. However, studies into the long-term consequences of these anomalies are scarce.

**Keywords:** meta-analysis; multicystic dysplastic kidney; urinary tract abnormalities; vesicoureteric reflux

### Introduction

A multicystic dysplastic kidney (MCDK) is a form of renal dysplasia that leads to a non-functioning organ due to abnormal and incomplete kidney development. The first description of an MCDK at autopsy was in 1836, and the first description of an MCDK removed at surgery was reported a century later [1]. In 1955, MCDK was identified as a separate entity, distinct from polycystic kidneys, which it was generally clustered with until that time [2]. Edith Potter, in her book *Normal and Abnormal Development of the Kidney* [3], suggested that primary failure of nephron induction was the underlying mechanism leading to MCDKs, resulting in incompletely branched ducts surrounded by connective tissue, which contains undifferentiated and metaplastic cells such as cartilage- and smooth muscle-like cells. Even though no nephrogenic zone at any stage of nephrogenesis, and hence the complete absence of nephrons, was described by Potter, MCDKs sometimes do contain some functional renal tissue [4] with recognizable glomeruli and proximal tubules [5–10]. Alternatively, the disruption of normal nephrogenesis could, at least in part, be explained by an impaired fetal urine flow early in development, which is consistent with the general finding of non-patent or atretic ureters attached to MCDKs (for a review [11,12]).

Bilateral MCDK leads to absent fetal and neonatal renal function with associated pulmonary hypoplasia and is therefore generally considered incompatible with extra-uterine life [13]. However, unilateral MCDK is a condition that does not lead to any complaints *per se*, except for potential mechanical problems due to a large abdominal mass in rare cases [14]. Before the era of prenatal ultrasound screening, this condition was mainly diagnosed in patients that underwent ultrasound assessment of the renal tract for another reason like a urinary tract infection or a palpable abdominal mass. As many MCDKs are known to show spontaneous involution, even before birth, a significant proportion of

**Table 1.** Reported incidences of unilateral multicystic dysplastic kidney

| Source                                                                           | Year | Country      | Age at diagnosis                     | Number of patients with unilateral MCDK | Size of population screened | Incidence |
|----------------------------------------------------------------------------------|------|--------------|--------------------------------------|-----------------------------------------|-----------------------------|-----------|
| Helin [18]                                                                       | 1986 | Sweden       | Prenatal with postnatal confirmation | 7                                       | 11 986                      | 1/1712    |
| Gordon [19]                                                                      | 1988 | UK           | Prenatal with postnatal confirmation | 10                                      | 43 175                      | 1/4318    |
| Evans [20]                                                                       | 1989 | Canada       | NR                                   | 14                                      | 83 893                      | 1/5992    |
| Sheih [21]                                                                       | 1989 | China        | 6–12 years                           | 21                                      | 132 686                     | 1/6318    |
| Al-Khalidi [22]                                                                  | 1994 | UK           | Prenatal with postnatal confirmation | 14                                      | 43 419                      | 1/3101    |
| Gloor [23]                                                                       | 1995 | USA          | Prenatal with postnatal confirmation | 11                                      | 26 770                      | 1/2434    |
| Gunn [24]                                                                        | 1995 | New Zealand  | Prenatal with postnatal confirmation | 8                                       | 3856                        | 1/482     |
| Kim [25]                                                                         | 1996 | Korea        | Prenatal                             | 5                                       | 5442                        | 1/1088    |
| Liebeschuetz [26]                                                                | 1997 | UK           | Prenatal with postnatal confirmation | 14                                      | 33 537                      | 1/2395    |
| Dillon [27]                                                                      | 1998 | UK           | Prenatal with postnatal confirmation | 10                                      | 25 382                      | 1/2538    |
| James [28]                                                                       | 1998 | UK           | Prenatal with postnatal confirmation | 22                                      | 105 542                     | 1/4797    |
| Kessler [29]                                                                     | 1998 | Israel       | Various ages                         | 23                                      | NR                          | 1/3310    |
| Harmat [30]                                                                      | 2001 | Hungary      | Postnatal                            | 13                                      | 46 858                      | 1/3604    |
| Vial [31]                                                                        | 2001 | Switzerland  | Prenatal with postnatal confirmation | 23                                      | 38 110                      | 1/1657    |
| Hiraoka [17]                                                                     | 2002 | Japan        | Neonatal                             | 1                                       | 4000                        | 1/4000    |
| Raboei [32]                                                                      | 2002 | Saudi Arabia | Prenatal                             | 21                                      | 19 400                      | 1/924     |
| Ylinen [33]                                                                      | 2002 | Finland      | Prenatal with postnatal confirmation | 51                                      | 209 125                     | 1/4100    |
| Wiesel [34]                                                                      | 2005 | Europe-wide  | Prenatal with postnatal confirmation | 105                                     | 709 030                     | 1/6753    |
| Mallik [35]                                                                      | 2008 | UK           | Prenatal with postnatal confirmation | 21                                      | 46 060                      | 1/2193    |
| Overall <sup>a</sup>                                                             |      |              |                                      | 371                                     | 1 588 271                   | 1/4281    |
| All cohorts with postnatal ultrasound confirmation of prenatal diagnosis of MCDK |      |              |                                      | 296                                     | 1 295 992                   | 1/4378    |

MCDK, multicystic dysplastic kidney. NR, not reported.

<sup>a</sup>Excluding the article by Kessler *et al.* [29] as the size of the screened population was not provided.

patients diagnosed in the era before antenatal ultrasound screening with unilateral renal agenesis (based on the absence of a single kidney) may actually have had a completely regressed MCDK [15–17]. This may explain part of the differences in the incidence of unilateral MCDK that have been reported (Table 1) [17–35]. Based on the available ultrasound data, the general incidence can be estimated to be around 1 in 4300.

MCDK has been described to be associated with general dysmorphologies and contralateral urinary tract abnormalities, like vesicoureteric reflux (VUR) and pelvi-ureteric junction obstruction (PUJO). However, these associated anomalies have been reported in highly variable frequencies. A likely factor in this variation may be the timing of diagnosis of the MCDK (i.e. pre- versus post-natally). It may be anticipated that before the introduction of prenatal ultrasound screening, patients presenting with MCDK were the ones that had clinically relevant associated anomalies. This makes it important to differentiate between cohorts that are defined by prenatal screening and cohorts that are based on patients with MCDK that presented with clinical symptoms.

In this paper, we set out to describe the status of the urinary tract, including contralateral hypertrophy and malformations, in patients with unilateral MCDK based on a meta-analysis of the literature, taking into account the timing of diagnosis.

## Materials and methods

### Search strategy

A PubMed search was conducted for articles published from January 1966 onwards that contained the keywords ‘multicystic dysplastic kidney’ or ‘multicystic kidney dysplasia’ and/or were labelled with the Medical Subject Heading (MeSH) ‘multicystic dysplastic kidney’ (total hits 373, 2 June 2008). An Embase search was conducted with the search strategy ‘multicystic’ and (‘dysplastic’ or ‘dysplasia’/exp or ‘dysplasia’) and (‘kidney’/exp or ‘kidney’), resulting in 714 hits (2 June 2008). In addition, the ‘related articles’ function in PubMed was used from articles that were considered for inclusion. Also, reference lists from included publications were searched manually.

### Selection of articles

All cohort studies describing the pre- and/or postnatal characteristics of patients with unilateral MCDK were of interest. Title and/or abstract of

all articles identified were screened by one of the authors (MFS), and relevant original studies were read in full. Case reports were specifically excluded from the meta-analysis, as were abstracts only and articles in non-English languages, as this prevented us from accurate analysis of the cohort description. When several articles described (part of) the same cohort, only the study with the most accurate description of the largest cohort was included. In total, 72 articles were considered for the meta-analysis. Papers excluding part of the cohort on the basis of concomitant anomalies were excluded from our analysis.

#### Data abstraction

Data on timing of diagnosis (prenatal or postnatal) and the reason for the postnatal investigation were extracted, together with, when specified, the number of patients with complete prenatal ultrasonic involution of the MCDK, and the number of patients with any activity on postnatal renography at the site of the MCDK. Also, the patients' gender and side of the MCDK were obtained. From the retrieved cohorts, we intended to only analyse the children who were diagnosed with unilateral MCDK. However, as some papers reported genders for the unilateral and bilateral MCDK patients combined, data are presented for all studies together and for studies with only unilateral MCDK patients separately. Based on the classification of the original paper, the number and/or proportion of patients classified as having any urinary tract abnormality (either structural or functional), and the number and/or proportion of patients classified as having extra-urinary tract abnormalities were noted (labelled as associated abnormalities).

The number of patients evaluated with a micturating cystourethrogram (MCUG) was extracted from the papers, and the percentage of patients evaluated with an MCUG was calculated. In order to minimize the effect of possible selection of patients that showed clinical abnormalities, a separate analysis of the MCUG results was performed in cohorts where at least 95% of patients were evaluated with a MCUG. VUR was classified as present or absent, and, when present, as ipsilateral (i.e. at the side of the MCDK), contralateral or bilateral. When available, the grading of VUR according to the International Reflux Study Committee classification was noted [36]. As some papers showed the number of patients per cluster of VUR grades, the clustering as used by the International Reflux Study in Children was adapted, classifying grades III–V as 'severe' [37].

In each cohort, the number of patients with specific urinary tract abnormalities based on ultrasound and/or renography were noted, and classified as PUJO, ureterovesical junction obstruction, non-obstructive megaureter, ureterocele, posterior urethral valves (PUV), horseshoe kidney or miscellaneous. When noted, the number of patients with contralateral renal hypertrophy (renal length  $\geq$ 95th percentile based on the centile chart used in the specific paper) was obtained, as well as differences in renal size between patients with and without contralateral VUR.

#### Analysis

With these data, a cumulative meta-analysis was performed. Since not all items were reported in all publications, each item is presented as the number of patients in which that item was present divided by the total number of patients in the cohorts that presented data on that specific item. For the associated urinary tract abnormalities, the denominator is based on the number of patients that were evaluated with ultrasound in the cohorts that presented data on this. As a consequence of the highly variable presentation of items amongst the cohorts, the total number presented as denominator in Tables 2–4 is different for nearly every item.

Comparison of two proportions of categorical data was done by the chi-square test. As some data indicate that the presence of VUR may influence the size of the solitary functioning kidney opposite the MCDK [38,39], data from studies comparing renal size between patients with and without VUR [38–40] were combined, and analysed using Review Manager (RevMan) version 4.2 for Windows (Copenhagen: The Nordic Cochrane Centre, The Cochrane Collaboration, 2003). This enables the calculation of a pooled effect size of weighted mean differences for continuous data together with a 95% confidence interval (95% CI), based on a random-effects model. A random-effects model was chosen *a priori* as we had the impression that a variation in the study populations would result in between-study heterogeneity beyond that of sampling variability. The weight (%) is based on study size and variation of the data (standard

deviation). Statistical differences were considered significant if  $P < 0.05$  (two-tailed).

## Results

Characteristics of the cohorts included, including a meta-analysis, are presented in Table 2. Four articles excluded part of the cohort based on contralateral urinary tract anomalies, like hydronephrosis or abnormal renal position [41] or the complexity of cases [42–44], and for another paper, data of patients with MCDK could not be separated from other diagnoses [45]. These cohorts were therefore excluded from our analysis. Other cohorts excluded patients in which not all diagnostic scans were performed [46–48] or that underwent nephrectomy [49]; the demographic data of these cohorts were included in the analysis. Three papers reported results from autopsies, and did not provide any data on the function of the urinary system like VUR [50–52]. Nevertheless, the characteristics were included in Table 2. Presentation of the data from 11 cohorts included patients with bilateral MCDK [7,22,50,53–60]. In order to analyse the demographic data of subjects with unilateral MCDK separately, Table 2 also shows obtained data from all patients with unilateral MCDK only.

Overall, the majority of subjects with a unilateral MCDK were male (59.2%,  $P < 0.0001$  compared with the expected 51% [61]), and MCDKs were found on the left side in just over half (53.1%,  $P < 0.02$  when compared with the expected 50%). Based on the papers that reported the timing of diagnosis, 19.2% of patients were diagnosed with MCDK postnatally. Indications for ultrasound evaluation of the abdomen and/or urinary tract were an abdominal mass in 64.2%, a urinary tract infection in 7.1%, and various in the rest.

Five studies reported the number of patients that had shown a (sign of) MCDK on prenatal screening but showed no visible renal tissue on the first postnatal ultrasound, thereby showing complete prenatal involution of MCDK [58,62–65]. Combining the data from these five studies, 21 out of 389 (5.4%) individuals showed complete prenatal involution of the MCDK. MCDKs are occasionally reported to show activity on postnatal renography even though histology is consistent with MCDK [4]; seven of the included cohorts reported that some patients (in total 27) showed activity on a postnatal renogram at the site of the MCDK (range of activity 1–18%) [4,46,66–70].

Data on contralateral renal hypertrophy at the first ultrasound soon after birth were reported by two papers, and showed that hypertrophy was present in 12 out of 26 (46.2%) [42] and 8 out of 33 (24.2%) [71] patients. Four papers presented data on compensatory renal hypertrophy after a follow-up of at least 10 years, which showed hypertrophy in 1/3 (33%) [72], 2/2 (100%) [71], 3/5 (60%) [62] and 35/43 (81%) [65] patients (overall 41/53, 77%).

Table 3 shows the data on associated abnormalities. Overall, 14.9% of patients showed malformations outside the urinary tract, which was similar in the selected cohorts with 100% prenatal diagnosis. Urinary tract malformations were described in 31.3% of patients with unilateral MCDK, which was significantly higher (35.9%,  $P < 0.02$ ) in the

**Table 2.** Characteristics of included studies

| Source                 | Year | No. of subjects  | MCDK side (right:left) | Gender distribution (male:female) | Diagnosis (prenatal: postnatal) | Percentage of unilateral cases evaluated with MCUG | No. (n/N) of nephrectomies |
|------------------------|------|------------------|------------------------|-----------------------------------|---------------------------------|----------------------------------------------------|----------------------------|
| Pathak [50]            | 1964 | 21 <sup>a</sup>  | 9:11                   | 15:6                              | 0:21                            | NR                                                 | 9/12                       |
| Greene [53]            | 1971 | 38 <sup>a</sup>  | NR                     | 23:15                             | NR                              | NR                                                 | 15/30                      |
| Risdon [51]            | 1971 | 14               | 5:9                    | 7:7                               | NR                              | NR                                                 | 14/14                      |
| Gipson [91]            | 1976 | 22               | 9:13                   | 11:11                             | 0:22                            | NR                                                 | 22/22                      |
| De Klerk [54]          | 1977 | 29 <sup>a</sup>  | 9:17                   | 19:10                             | 0:29                            | 24%                                                | 26/26                      |
| Walker [92]            | 1978 | 11               | 6:5                    | 7:4                               | 0:11                            | NR                                                 | 8/11                       |
| Stuck [66]             | 1982 | 15               | 7:8                    | NR                                | 1:14                            | NR                                                 | 9/15                       |
| Kleiner [93]           | 1986 | 22               | 7:15                   | NR                                | 22:0 <sup>b</sup>               | NR                                                 | 0/18                       |
| Pedicelli [94]         | 1986 | 9                | 5:4                    | 5:4                               | 3:6                             | NR                                                 | 1/9                        |
| Avni [55]              | 1987 | 13 <sup>a</sup>  | NR                     | NR                                | 13:0 <sup>b</sup>               | NR                                                 | NR                         |
| Bachmann [95]          | 1988 | 11               | NR                     | 6:5                               | 4:7                             | 82%                                                | 3/11                       |
| Gordon [19]            | 1988 | 23               | 7:16                   | 13:10                             | 18:5                            | NR                                                 | 7/21                       |
| Vinocur [5]            | 1988 | 30               | 12:18                  | 17:13                             | 5:25                            | 50%                                                | 9/30                       |
| Kullendorff [96]       | 1990 | 29               | 13:16                  | 21:8                              | 17:12                           | 59%                                                | 26/29                      |
| Atiyeh [97]            | 1992 | 56               | 28:28                  | 25:31                             | 22:34                           | 88%                                                | NR                         |
| Orejas [56]            | 1992 | 24 <sup>a</sup>  | 11:12                  | 18:6                              | 16:8                            | 50%                                                | 11/23                      |
| Rickwood [57]          | 1992 | 44 <sup>a</sup>  | 22:21                  | 32:12                             | 44:0 <sup>b</sup>               | NR                                                 | 5/43                       |
| Akl [98]               | 1993 | 24               | 6:18                   | 11:13                             | 17:7                            | 42%                                                | NR                         |
| Chang [99]             | 1993 | 12               | 2:10                   | 7:5                               | 5:7                             | 8%                                                 | 10/12                      |
| Flack [100]            | 1993 | 29               | 15:14                  | 19:10                             | 22:7                            | 97%                                                | NR                         |
| Strife [46]            | 1993 | 48               | 21:27                  | 26:22                             | 28:20                           | 92%                                                | 5/48                       |
| Wacksman [101]         | 1993 | 441              | 198:233 <sup>c</sup>   | 250:191                           | 288:153                         | 15%                                                | 181/441                    |
| Al-Khaldi [22]         | 1994 | 44 <sup>a</sup>  | 15:15                  | 27:17                             | 30:0 <sup>b</sup>               | 100%                                               | 2/44                       |
| Mandell [67]           | 1994 | 30               | 14:16                  | 20:10                             | 30:0 <sup>b</sup>               | 87%                                                | NR                         |
| Sapin [7]              | 1994 | 60 <sup>a</sup>  | 26:33                  | 40:20                             | 54:6                            | Few                                                | 35/59                      |
| Gloor [23]             | 1995 | 11               | 4:7                    | 9:2                               | 11:0 <sup>b</sup>               | 64%                                                | 1/11                       |
| Gough [68]             | 1995 | 62               | 23:39                  | 41:21                             | 62:0 <sup>b</sup>               | 100%                                               | 37/62                      |
| Han [102]              | 1995 | 11               | 4:7                    | 8:3                               | 7:4                             | 18%                                                | 9/11                       |
| Kaneko [103]           | 1995 | 7                | 4:3                    | 2:5                               | 5:2                             | 100%                                               | 6/7                        |
| Selzman [104]          | 1995 | 65               | 28:37                  | 37:28                             | 57:8                            | 100%                                               | NR                         |
| Karmazyn [48]          | 1997 | 68 <sup>c</sup>  | NR                     | 35:24                             | NR                              | 87%                                                | NR                         |
| Rottenberg [47]        | 1997 | 66               | 39:28                  | NR                                | 60:6                            | 100%                                               | 14/55                      |
| John [71]              | 1998 | 35               | 14:21                  | 20:15                             | 35:0 <sup>b</sup>               | 100%                                               | 6/33                       |
| Kessler [29]           | 1998 | 23               | 8:15                   | 16:7                              | 18:5                            | 87%                                                | 4/23                       |
| Perez [105]            | 1998 | 49               | NR                     | 32:17                             | 48:1                            | 90%                                                | 12/49                      |
| Rudnik-Schoneborn [72] | 1998 | 204              | 111:93                 | 108:96                            | 134:70                          | 42%                                                | 40/204                     |
| White [106]            | 1998 | 33               | NR                     | NR                                | NR                              | 100%                                               | 10/33                      |
| Lazebnik [58]          | 1999 | 102 <sup>a</sup> | 39:39                  | 72:30                             | 102:0 <sup>b</sup>              | 24%                                                | NR                         |
| Feldenberg [59]        | 2000 | 35 <sup>a</sup>  | 9:19                   | 28:7                              | NR                              | 23%                                                | NR                         |
| Sukthankar [62]        | 2000 | 70               | 28:42                  | 31:39                             | 70:0 <sup>b</sup>               | 90%                                                | 4/70                       |
| Fanos [38]             | 2001 | 27               | 14:13                  | 17:10                             | 27:0 <sup>b</sup>               | 100%                                               | 6/27                       |
| Oliveira [107]         | 2001 | 20               | 6:14                   | 10:10                             | 20:0 <sup>b</sup>               | 100%                                               | 0/20                       |
| Ranke [60]             | 2001 | 138 <sup>a</sup> | 50:75                  | 83:52 <sup>d</sup>                | 138:0 <sup>b</sup>              | 99%                                                | 85/108                     |
| Seeman [108]           | 2001 | 25               | 12:13                  | 9:16                              | 19:6                            | 92%                                                | 11/25                      |
| Abidari [109]          | 2002 | 48               | 22:26                  | 30:18                             | NR                              | 100%                                               | NR                         |
| Aubertin [63]          | 2002 | 73               | 35:38                  | 33:32 <sup>d</sup>                | 73:0 <sup>b</sup>               | NR                                                 | 9/26                       |
| Van Eijk [69]          | 2002 | 38               | 18:20                  | 24:14                             | 38:0 <sup>b</sup>               | 97%                                                | 33/35                      |
| Metcalfe [4]           | 2002 | 54               | 24:30                  | 32:22                             | 52:2                            | NR                                                 | NR                         |
| Eckoldt [110]          | 2003 | 93               | NR                     | NR                                | 93:0 <sup>b</sup>               | 95%                                                | 51/93                      |
| Okada [111]            | 2003 | 10               | 3:7                    | 3:7                               | 10:0 <sup>b</sup>               | 100%                                               | 0/10                       |
| Tilemis [112]          | 2003 | 41               | 19:22                  | 28:13                             | 25:16                           | 78%                                                | 21/41                      |
| Kaneyama [113]         | 2004 | 30               | NR                     | NR                                | 22:8                            | 100%                                               | NR                         |
| Kuwertz-Broeking [114] | 2004 | 97               | 55:42                  | 60:37                             | 82:15                           | 92%                                                | 17/97                      |
| Miller [39]            | 2004 | 75               | 48:27                  | 44:31                             | 52:23                           | 100%                                               | 25/75                      |
| Ylinen [115]           | 2004 | 48               | 20:28                  | 26:22                             | 37:11                           | NR                                                 | 32/48                      |
| Alconcher [64]         | 2005 | 31               | 9:22                   | 17:14                             | 31:0 <sup>b</sup>               | 42%                                                | 4/31                       |
| Al Ghwery [116]        | 2005 | 35               | 18:17                  | 18:17                             | 35:0 <sup>b</sup>               | 100%                                               | 0/35                       |
| Damen-Elias [70]       | 2005 | 100              | 53:47                  | 58:41 <sup>d</sup>                | 100:0 <sup>b</sup>              | 83%                                                | 79/87                      |
| Guarino [117]          | 2005 | 62               | 31:31                  | 40:22                             | NR                              | 100%                                               | NR                         |
| Ismaili [40]           | 2005 | 76               | 35:41                  | 44:32                             | 76:0 <sup>b</sup>               | 100%                                               | NR                         |
| Rahman [118]           | 2005 | 69               | 30:39                  | 39:30                             | 46:23                           | 100%                                               | 8/69                       |

Continued

**Table 2.** *Continued*

| Source                                 | Year | No. of subjects    | MCDK side (right:left)   | Gender distribution (male:female) | Diagnosis (prenatal: postnatal) | Percentage of unilateral cases evaluated with MCUG | No. (n/N) of nephrectomies |
|----------------------------------------|------|--------------------|--------------------------|-----------------------------------|---------------------------------|----------------------------------------------------|----------------------------|
| Aslam [65]                             | 2006 | 202                | 99:103                   | NR                                | 202:0 <sup>b</sup>              | 71%                                                | 11/202                     |
| Kakkar [52]                            | 2006 | 27                 | NR                       | NR                                | NR                              | NR                                                 | NR                         |
| Krzemien [119]                         | 2006 | 17                 | 8:9                      | NR                                | 10:7                            | 100%                                               | 6/17                       |
| Merrot [120]                           | 2006 | 93                 | 49:44                    | 52:41                             | 93:0 <sup>b</sup>               | 100%                                               | NR                         |
| Onal [49]                              | 2006 | 61                 | 33:28                    | 43:18                             | 49:12                           | 100%                                               | 4/72                       |
| Vu [121]                               | 2008 | 36                 | 18:18                    | 23:13                             | NR                              | NR                                                 | 4/36                       |
| Overall                                |      | 3,557 <sup>a</sup> | 1467:1663<br>46.9%:53.1% | 1791:1236<br>59.2%:40.8%          | 2581:613<br>80.8%:19.2%         |                                                    | 947/2630<br>36.0%          |
| Overall, excluding all bilateral cases |      | 3,009              |                          | 1434:1061<br>57.5%:42.5%          |                                 |                                                    |                            |

MCDK, multicystic dysplastic kidney; MCUG, micturating cystourethrogram.

<sup>a</sup>Some patients were diagnosed with bilateral MCDK.

<sup>b</sup>Included in sub-group analysis of cohorts with 100% prenatal diagnosis. NR, not reported.

<sup>c</sup>Data of some patients were not available.

<sup>d</sup>The gender of some patients was unknown, for instance due to a termination of the pregnancy.

**Table 3.** Demographic details of subjects with multicystic dysplastic kidneys

|                                                     | All cohorts        | Cohorts with 100% prenatal diagnosis only | P-value |
|-----------------------------------------------------|--------------------|-------------------------------------------|---------|
| No. of articles                                     | 67                 | 23                                        |         |
| No. of subjects                                     | 3557               | 1369                                      |         |
| Male <sup>a</sup>                                   | 1791/3027 (59.2%)  | 611/1027 (59.5%)                          | NS      |
| left-sided MCDK <sup>a</sup>                        | 1663/3,130 (53.1%) | 656/1211 (54.2%)                          | NS      |
| Associated anomalies <sup>a</sup>                   | 199/1340 (14.9%)   | 136/915 (14.9%)                           | NS      |
| Associated urinary tract abnormalities <sup>a</sup> | 757/2415 (31.3%)   | 299/834 (35.9%)                           | <0.02   |
| VUR present <sup>a</sup>                            | 415/2104 (19.7%)   | 196/962 (20.4%)                           | NS      |
| PUJO <sup>a</sup>                                   | 103/2159 (4.8%)    | 34/934 (3.6%)                             | NS      |
| Ureterocele <sup>a</sup>                            | 29/2159 (1.3%)     | 12/934 (1.3%)                             | NS      |
| Horseshoe kidney <sup>a</sup>                       | 13/2159 (0.60%)    | 4/934 (0.43%)                             | NS      |
| PUV <sup>a</sup>                                    | 9/2159 (0.42%)     | 5/934 (0.54%)                             | NS      |

<sup>a</sup>Data presented as n/N (%).

NS, not significant; VUR, vesicoureteric reflux; PUJO, pelviureteric junction obstruction; PUV, posterior urethral valves.

prenatally diagnosed cohorts; the majority of these abnormalities consisted of VUR.

In cohorts that described results from MCUGs ( $n = 51$ ), on average 70% of the subjects within the cohort had at least one MCUG performed (Table 2). Overall, 19.7% of patients with a unilateral MCDK had VUR (Table 4); the mean of the reported incidences was 19.3% (95% CI 15.3–23.3%). This could be classified as severe in 40.5% (i.e. 8.0% of patients with unilateral MCDK show severe VUR). Excluding studies that could potentially have caused bias did not influence these results significantly (17.8% VUR, of which 40.0% graded severe, i.e. 7.1% of patients with unilateral MCDK show severe VUR). Other malformations included PUJO in 4.8% of patients, ureteroceles in 1.3% of patients, horseshoe kidney in 0.60% of patients and PUV in 0.42% of patients (Table 3).

A few cohorts reported data on renal size differences between patients with and without VUR [38–40]. One paper showed significantly smaller kidneys at birth and at 2 years of age in patients with VUR compared with patients without

VUR [38], whereas the other two reported no significant difference between the groups [39,40]. Combining the data at the age of  $\sim 2$  years, available from two papers [38,39], the solitary functioning kidney with VUR showed a trend to be smaller than the one without VUR [mean difference  $-0.88$  cm (95% CI  $-1.82$ – $-0.07$  cm,  $P = 0.07$ )].

## Discussion

With this meta-analysis on demographic data and analysis of the contralateral urinary tract in patients with unilateral MCDK, we have provided an overview of the available cohorts that were published in English. Based on the data in Table 1, the overall incidence of unilateral MCDK can be estimated to be around 1 in 4300. The data on complete prenatal involution of MCDKs indicate that a difference can be expected in the incidence between pre- and postnatal diagnosed cohorts. Including only the papers that based the diagnosis of MCDK on combined prenatal and postnatal

**Table 4.** Data on vesicoureteric reflux in subjects with a unilateral multicystic dysplastic kidney

|                             | All cohorts      | Cohorts with MCUG in at least 95% of subjects | Cohorts with MCUG in at least 95% of subjects and 100% prenatal diagnosis of MCDK |
|-----------------------------|------------------|-----------------------------------------------|-----------------------------------------------------------------------------------|
| No. of papers               | 67               | 24                                            | 12                                                                                |
| No. of subjects             | 3557             | 1233                                          | 671                                                                               |
| VUR <sup>a</sup>            | 415/2104 (19.7%) | 212/1164 (18.2%)                              | 109/614 (17.8%)                                                                   |
| Contralateral <sup>a</sup>  | 267/1783 (15.0%) | 154/1032 (14.9%)                              | 78/577 (13.5%)                                                                    |
| Ipsilateral <sup>a</sup>    | 59/1766 (3.3%)   | 29/1032 (2.8%)                                | 25/577 (4.3%)                                                                     |
| Bilateral <sup>a</sup>      | 42/1766 (2.4%)   | 24/1032 (2.3%)                                | 17/577 (2.9%)                                                                     |
| VUR contralateral           |                  |                                               |                                                                                   |
| Mild (I-II) <sup>a</sup>    | 100/168 (59.5%)  | 60/107 (56.1%)                                | 27/45 (60.0%)                                                                     |
| Severe (III-V) <sup>a</sup> | 68/168 (40.5%)   | 47/107 (43.9%)                                | 18/45 (40.0%)                                                                     |
| Grade I <sup>a</sup>        | 21/135 (15.6%)   | 15/101 (14.9%)                                | 10/45 (22.2%)                                                                     |
| Grade II <sup>a</sup>       | 54/135 (40.0%)   | 40/101 (39.6%)                                | 17/45 (37.8%)                                                                     |
| Grade III <sup>a</sup>      | 32/135 (23.7%)   | 22/101 (21.8%)                                | 7/45 (15.6%)                                                                      |
| Grade IV <sup>a</sup>       | 21/135 (15.6%)   | 17/101 (16.8%)                                | 9/45 (20.0%)                                                                      |
| Grade V <sup>a</sup>        | 7/135 (5.2%)     | 7/101 (6.9%)                                  | 2/45 (4.4%)                                                                       |

<sup>a</sup>Data presented as n/N (%).

MCUG, micturating cystourethrogram; MCDK, multicystic dysplastic kidney; VUR, vesicoureteric reflux.

ultrasound evaluation, the incidence is ~1 in 4400, which is slightly lower than all incidence data together. The fact that the incidence of MCDK may be increasing is also important in the interpretation of our results. Data from consecutive large cohorts in a specific region in the UK showed an incidence of 1 in ~4800 births in 1984–88 [28], whereas in the recent cohort (1999–2003) MCDK was present in 1 in ~2200 births [35]. The overall incidence of urinary tract abnormalities has increased as well in this region, which, according to the authors, is most likely to be secondary to the increasing sensitivity and accuracy of ultrasound screening [35]. Even though the reported sensitivity for the prenatal diagnosis of MCDK is only 53.3% during the period from 1985 to 1996 [73], the doubling in incidence of a gross malformation as MCDK is less likely to be explained by an increase in diagnostic sensitivity alone. Another explanation for the increasing incidence may be found in the increasing incidence of pre-existing diabetes during pregnancy [74,75], which has been associated with a higher incidence of MCDK [33]. On the other hand, an alternative explanation for the association between diabetes and MCDK can be found in the renal cysts and diabetes syndrome (RCAD syndrome, OMIM 137920), a syndrome based on mutations of the hepatocyte nuclear factor-1beta (HNF-1β) [76]. This may explain some of the familial associations that have been described to occur for MCDK [77–81]. Environmental influences, such as maternal antiepileptic drugs [82], on the occurrence of MCDK have been identified, as well as chromosomal defects [83] and other syndromes than RCAD that are associated with MCDK [84].

Based on data from the 67 included studies, MCDK is significantly more frequently found on the left side (53.1%). Also, there is a male predominance (59.2% male), which is commonly found with renal tract malformations [13]. In total, seven cohorts reported on activity on renography at the side of the MCDK in a total of 27 patients. No overall percentage is presented for this number, as most cohorts did not report the number of positive or negative cases on renography; most likely as it was found to be 0. In our

opinion, estimation of the overall percentage of MCDKs that show activity on renography is less important than to recognize the fact that some activity on renography does not exclude the diagnosis of MCDK.

Prenatal hypertrophy of the contralateral kidney was found in 24–46% of patients with unilateral MCDK in 2 cohorts included in our analysis. Glazebrook *et al.* [85] described prenatal hypertrophy in 17 out of 27 (63.0%) patients with congenital solitary functioning kidneys and Hill *et al.* [86] in 16 out of 36 (44.4%). However, both papers did not report the data for patients with unilateral renal agenesis and unilateral MCDK separately. Whether this hypertrophy is associated with an increase in nephron number remains to be determined. However, this was only to ~70% of total numbers in two kidney controls, which would still leave these patients with a low nephron endowment.

Overall, ~1 in 3 patients with unilateral MCDK has an associated urinary tract malformation, mostly being VUR in ~1 in 5. Of the patients with VUR, ~40% will have severe (grade III–V) VUR. As low-grade VUR is more and more recognized to be relatively self-limiting and not harmful, the discussion about the need to perform MCUG in children with urinary tract infections with ‘normal’ renal tracts is ongoing. As 1 in 12–14 children with unilateral MCDK will have severe VUR (Table 4), we feel that it is important to be informed about the presence of VUR in children with unilateral MCDK. Whether normal ultrasounds of the solitary kidney can be used to rule out non-low-grade VUR, and therefore the need for MCUG as suggested by Ismaili *et al.* [40], remains to be determined in larger cohorts.

Another contralateral urinary tract malformation is PUJO, which occurs in ~4–5% and may be severe enough to cause acute renal failure [65,87]. Ureterocele has been described frequently as well in patients with MCDK, but usually show a benign course [88]. A horseshoe kidney was described in 0.6%, which is higher than the estimated incidence of 0.15% in the general population [89]; indeed, several reports on MCDK in horseshoe kidneys have been published, which may show an association between the two conditions (for an overview, see [90]).

Our meta-analysis has several limitations. Most importantly, there was a high variability in the reported incidences of MCDK and the various associated (urinary tract and general) malformations. The high variability in the reported incidences may be explained by the era in which the diagnosis was made (i.e. before introduction of prenatal ultrasound screening vs. after introduction of standard prenatal ultrasound screening). Other possible explanations may be found in the size of the reported cohorts, the introduction of prenatal screening and adherence to a standardized schema of postnatal investigations once the diagnosis was made. Excluding cohorts that included patients in whom the diagnosis of MCDK was made postnatally did not basically influence the results. Only a difference in the proportion of associated urinary tract malformations was found, which was higher when the postnatally diagnosed patients were excluded. This was surprising, as we expected that patients diagnosed postnatally would have had a clinical reason to suspect a urinary tract malformation, thereby focussing on a group with a higher incidence of associated anomalies. A possible explanation may be that the reason for the postnatal investigation was a palpable abdominal mass in two-thirds, which is not expected to be influenced by any associated malformations like VUR.

In conclusion, our meta-analysis of 67 cohorts with over 3500 patients with unilateral MCDK has shown the demographics of this patient cohorts, male and the majority of MCKDs on the left side. Analysis of the data in 19 populations showed an overall incidence of unilateral MCDK of 1 in 4300 with an increasing trend over the years. Associated anomalies in the solitary functioning kidney were found in 1 in 3 patients, mainly VUR and PUJO. Severe contralateral VUR, defined as grade III–V, was found in 1 in every 12–14 patients with unilateral MCDK.

**Acknowledgement.** MFS is supported by a Fellowship from the European Renal Association–European Dialysis and Transplantation Association (ERA-EDTA).

**Conflict of interest statement.** None declared.

## References

- Bloom DA, Brosman S. The multicystic kidney. *J Urol* 1978; 120: 211–215
- Spence HM. Congenital unilateral multicystic kidney: an entity to be distinguished from polycystic kidney disease and other cystic disorders. *J Urol* 1955; 74: 693–706
- Potter EL. *Normal and Abnormal Development of the Kidney*. Chicago: Year Book Medical Publishers, 1972
- Metcalfe PD, Wright JR, Jr, Anderson PA. MCDK not excluded by virtue of function on renal scan. *Can J Urol* 2002; 9: 1690–1693
- Vinocur L, Slovis TL, Perlmutter AD *et al.* Follow-up studies of multicystic dysplastic kidneys. *Radiology* 1988; 167: 311–315
- Jung WH, Peters CA, Mandell J *et al.* Flow cytometric evaluation of multicystic dysplastic kidneys. *J Urol* 1990; 144: 413–415
- Sapin E, Moulinier F, Mikaelian JC *et al.* Dysplastic multicystic kidney: should the classical treatment (nephrectomy) be changed after prenatal diagnosis? *Pediatr Surg Int* 1994; 9: 507–510
- Matsell DG, Bennett T, Goodyer P *et al.* The pathogenesis of multicystic dysplastic kidney disease: insights from the study of fetal kidneys. *Lab Invest* 1996; 74: 883–893
- Shibata S, Shigeta M, Shu Y *et al.* Initial pathological events in renal dysplasia with urinary tract obstruction in utero. *Virchows Arch* 2001; 439: 560–570
- Furuhashi M, Kawai H, Chaya J *et al.* Normal nephrogenesis occurs in the early stage of bilateral multicystic dysplastic kidneys. *Arch Gynecol Obstet* 2002; 266: 133–135
- Woolf AS, Price KL, Scambler PJ *et al.* Evolving concepts in human renal dysplasia. *J Am Soc Nephrol* 2004; 15: 998–1007
- Woolf AS. Unilateral multicystic dysplastic kidney. *Kidney Int* 2006; 69: 190–193
- Damen-Elias HA, de Jong TP, Stigter RH *et al.* Congenital renal tract anomalies: outcome and follow-up of 402 cases detected antenatally between 1986 and 2001. *Ultrasound Obstet Gynecol* 2005; 25: 134–143
- Triest JA, Bukowski TP. Multicystic dysplastic kidney as cause of gastric outlet obstruction and respiratory compromise. *J Urol* 1999; 161: 1918–1919
- Mesrobian HG, Rushton HG, Bulas D. Unilateral renal agenesis may result from in utero regression of multicystic renal dysplasia. *J Urol* 1993; 150: 793–794
- Hitchcock R, Burge DM. Renal agenesis: an acquired condition? *J Pediatr Surg* 1994; 29: 454–455
- Hiraoka M, Tsukahara H, Ohshima Y *et al.* Renal aplasia is the predominant cause of congenital solitary kidneys. *Kidney Int* 2002; 61: 1840–1844
- Helin I, Persson PH. Prenatal diagnosis of urinary tract abnormalities by ultrasound. *Pediatrics* 1986; 78: 879–883
- Gordon AC, Thomas DF, Arthur RJ *et al.* Multicystic dysplastic kidney: is nephrectomy still appropriate? *J Urol* 1988; 140: 1231–1234
- Evans JA, Stranc LC. Cystic renal disease and cardiovascular anomalies. *Am J Med Genet* 1989; 33: 398–401
- Sheih CP, Liu MB, Hung CS *et al.* Renal abnormalities in schoolchildren. *Pediatrics* 1989; 84: 1086–1090
- al Khaldi N, Watson AR, Zuccollo J *et al.* Outcome of antenatally detected cystic dysplastic kidney disease. *Arch Dis Child* 1994; 70: 520–522
- Gloor JM, Ogburn PL, Jr, Breckle RJ *et al.* Urinary tract anomalies detected by prenatal ultrasound examination at Mayo Clinic Rochester. *Mayo Clin Proc* 1995; 70: 526–531
- Gunn TR, Mora JD, Pease P. Antenatal diagnosis of urinary tract abnormalities by ultrasonography after 28 weeks' gestation: incidence and outcome. *Am J Obstet Gynecol* 1995; 172: 479–486
- Kim EK, Song TB. A study on fetal urinary tract anomaly: antenatal ultrasonographic diagnosis and postnatal follow-up. *J Obstet Gynaecol Res* 1996; 22: 569–573
- Liebeschuetz S, Thomas R. Unilateral multicystic dysplastic kidney. *Arch Dis Child* 1997; 77: 369
- Dillon E, Ryall A. A 10-year audit of antenatal ultrasound detection of renal disease. *Br J Radiol* 1998; 71: 497–500
- James CA, Watson AR, Twining P *et al.* Antenatally detected urinary tract abnormalities: changing incidence and management. *Eur J Pediatr* 1998; 157: 508–511
- Kessler OJ, Ziv N, Livne PM *et al.* Involution rate of multicystic renal dysplasia. *Pediatrics* 1998; 102: E73
- Harmat G, Jojart G, Rubecz I. Coordinated ultrasound screening of infants: Hungary experience. *Eur J Ultrasound* 2001; 12: 209–219
- Vial Y, Tran C, Addor MC *et al.* Screening for foetal malformations: performance of routine ultrasonography in the population of the Swiss Canton of Vaud. *Swiss Med Wkly* 2001; 131: 490–494
- Raboei E, Abou-Seoud M, Abou-Nassef N *et al.* Prenatal ultrasound screening of the urinary tract is useful. *Pediatr Surg Int* 2002; 18: 432–434
- Ylinen E, Wikstrom S. Increased risk of multicystic dysplastic kidney among babies of both pre-gestational and gestational diabetic mothers. *Eur J Pediatr* 2002; 161: 634–635
- Wiesel A, Queisser-Luft A, Clementi M *et al.* Prenatal detection of congenital renal malformations by fetal ultrasonographic

- examination: an analysis of 709 030 births in 12 European countries. *Eur J Med Genet* 2005; 48: 131–144
35. Mallik M, Watson AR. Antenatally detected urinary tract abnormalities: more detection but less action. *Pediatr Nephrol* 2008; 23: 897–904
  36. Lebowitz RL, Olbing H, Parkkulainen KV *et al.* International system of radiographic grading of vesicoureteric reflux. International Reflux Study in Children. *Pediatr Radiol* 1985; 15: 105–109
  37. Jodal U, Smellie JM, Lax H *et al.* Ten-year results of randomized treatment of children with severe vesicoureteral reflux. Final report of the International Reflux Study in Children. *Pediatr Nephrol* 2006; 21: 785–792
  38. Fanos V, Sinaguglia G, Vino L *et al.* Multicystic dysplastic kidney and contralateral vesicoureteral reflux. Renal growth. *Minerva Pediatr* 2001; 53: 95–98
  39. Miller DC, Rumohr JA, Dunn RL *et al.* What is the fate of the refluxing contralateral kidney in children with multicystic dysplastic kidney? *J Urol* 2004; 172: 1630–1634
  40. Ismaili K, Avni FE, Alexander M *et al.* Routine voiding cystourethrography is of no value in neonates with unilateral multicystic dysplastic kidney. *J Pediatr* 2005; 146: 759–763
  41. Zerlin JM, Leiser J. The impact of vesicoureteral reflux on contralateral renal length in infants with multicystic dysplastic kidney. *Pediatr Radiol* 1998; 28: 683–686
  42. Heymans C, Breysen L, Proesmans W. Multicystic kidney dysplasia: a prospective study on the natural history of the affected and the contralateral kidney. *Eur J Pediatr* 1998; 157: 673–675
  43. Weinstein A, Goodman TR, Iragorri S. Simple multicystic dysplastic kidney disease: end points for subspecialty follow-up. *Pediatr Nephrol* 2008; 23: 111–116
  44. Siqueira Rabelo EA, Oliveira EA, Silva JM *et al.* Ultrasound progression of prenatally detected multicystic dysplastic kidney. *Urology* 2006; 68: 1098–1102
  45. Singh S, Gupta R, Nigam S *et al.* Clinico-pathological profile of 22 cases of cystic renal dysplasia. *Indian J Pathol Microbiol* 2007; 50: 6–10
  46. Strife JL, Souza AS, Kirks DR *et al.* Multicystic dysplastic kidney in children: US follow-up. *Radiology* 1993; 186: 785–788
  47. Rottenberg GT, Gordon I, De Bruyn R. The natural history of the multicystic dysplastic kidney in children. *Br J Radiol* 1997; 70: 347–350
  48. Karmazyn B, Zerlin JM. Lower urinary tract abnormalities in children with multicystic dysplastic kidney. *Radiology* 1997; 203: 223–226
  49. Onal B, Kogan BA. Natural history of patients with multicystic dysplastic kidney—what followup is needed? *J Urol* 2006; 176: 1607–1611
  50. Pathak IG, Williams DI. Multicystic and cystic dysplastic kidneys. *Br J Urol* 1964; 36: 318–331
  51. Risdon RA. Renal dysplasia. I. A clinico-pathological study of 76 cases. *J Clin Pathol* 1971; 24: 57–71
  52. Kakkar N, Menon S, Radotra BD. Histomorphology of renal dysplasia—an autopsy study. *Fetal Pediatr Pathol* 2006; 25: 73–86
  53. Greene LF, Feinzaig W, Dahlin DC. Multicystic dysplasia of the kidney: with special reference to the contralateral kidney. *J Urol* 1971; 105: 482–487
  54. de Klerk DP, Marshall FF, Jeffs RD. Multicystic dysplastic kidney. *J Urol* 1977; 118: 306–308
  55. Avni EF, Thoua Y, Lalmand B *et al.* Multicystic dysplastic kidney: natural history from in utero diagnosis and postnatal followup. *J Urol* 1987; 138: 1420–1424
  56. Orejas G, Malaga S, Santos F *et al.* Multicystic dysplastic kidney: absence of complications in patients treated conservatively. *Child Nephrol Urol* 1992; 12: 35–39
  57. Rickwood AM, Anderson PA, Williams MP. Multicystic renal dysplasia detected by prenatal ultrasonography. Natural history and results of conservative management. *Br J Urol* 1992; 69: 538–540
  58. Lazebnik N, Bellinger MF, Ferguson JE *et al.* Insights into the pathogenesis and natural history of fetuses with multicystic dysplastic kidney disease. *Prenat Diagn* 1999; 19: 418–423
  59. Feldenberg LR, Siegel NJ. Clinical course and outcome for children with multicystic dysplastic kidneys. *Pediatr Nephrol* 2000; 14: 1098–1101
  60. Ranke A, Schmitt M, Didier F *et al.* Antenatal diagnosis of multicystic renal dysplasia. *Eur J Pediatr Surg* 2001; 11: 246–254
  61. Mathews TJ, Hamilton BE. *Trend analysis of the sex ratio at birth in the United States. National vital statistics reports.* National Center for Health Statistics, Hyattsville, Maryland: 2005
  62. Sukthankar S, Watson AR. Unilateral multicystic dysplastic kidney disease: defining the natural history. Anglia Paediatric Nephrology Group. *Acta Paediatr* 2000; 89: 811–813
  63. Aubertin G, Cripps S, Coleman G *et al.* Prenatal diagnosis of apparently isolated unilateral multicystic kidney: implications for counselling and management. *Prenat Diagn* 2002; 22: 388–394
  64. Alconcher L, Tombesi M. Multicystic dysplastic kidney detected by prenatal ultrasonography: conservative management. *Pediatr Nephrol* 2005; 20: 1024–1025
  65. Aslam M, Watson AR. Unilateral multicystic dysplastic kidney: long term outcomes. *Arch Dis Child* 2006; 91: 820–823
  66. Stuck KJ, Koff SA, Silver TM. Ultrasonic features of multicystic dysplastic kidney: expanded diagnostic criteria. *Radiology* 1982; 143: 217–221
  67. Mandell J, Paltiel HJ, Peters CA *et al.* Prenatal findings associated with a unilateral nonfunctioning or absent kidney. *J Urol* 1994; 152: 176–178
  68. Gough DC, Postlethwaite RJ, Lewis MA *et al.* Multicystic renal dysplasia diagnosed in the antenatal period: a note of caution. *Br J Urol* 1995; 76: 244–248
  69. van Eijk L, Cohen-Overbeek TE, den Hollander NS *et al.* Unilateral multicystic dysplastic kidney: a combined pre- and postnatal assessment. *Ultrasound Obstet Gynecol* 2002; 19: 180–183
  70. Damen-Elias HA, Stoutenbeek PH, Visser GH *et al.* Concomitant anomalies in 100 children with unilateral multicystic kidney. *Ultrasound Obstet Gynecol* 2005; 25: 384–388
  71. John U, Rudnik-Schoneborn S, Zerres K *et al.* Kidney growth and renal function in unilateral multicystic dysplastic kidney disease. *Pediatr Nephrol* 1998; 12: 567–571
  72. Rudnik-Schoneborn S, John U, Deget F *et al.* Clinical features of unilateral multicystic renal dysplasia in children. *Eur J Pediatr* 1998; 157: 666–672
  73. Eckoldt F, Woderich R, Smith RD *et al.* Antenatal diagnostic aspects of unilateral multicystic kidney dysplasia—sensitivity, specificity, predictive values, differential diagnoses, associated malformations and consequences. *Fetal Diagn Ther* 2004; 19: 163–169
  74. Metzger BE, Buchanan TA, Coustan DR *et al.* Summary and recommendations of the Fifth International Workshop-Conference on Gestational Diabetes Mellitus. *Diabetes Care* 2007; 30(Suppl 2): S251–S260
  75. Lawrence JM, Contreras R, Chen W *et al.* Trends in the prevalence of preexisting diabetes and gestational diabetes mellitus among a racially/ethnically diverse population of pregnant women, 1999–2005. *Diabetes Care* 2008; 31: 899–904
  76. Edghill EL, Bingham C, Ellard S *et al.* Mutations in hepatocyte nuclear factor-1beta and their related phenotypes. *J Med Genet* 2006; 43: 84–90
  77. Moazin MS, Ahmed S, Fouda-Neel K. Multicystic kidney in siblings. *J Pediatr Surg* 1997; 32: 119–120
  78. Srivastava T, Garola RE, Hellerstein S. Autosomal dominant inheritance of multicystic dysplastic kidney. *Pediatr Nephrol* 1999; 13: 481–483
  79. Belk RA, Thomas DF, Mueller RF *et al.* A family study and the natural history of prenatally detected unilateral multicystic dysplastic kidney. *J Urol* 2002; 167: 666–669
  80. Watanabe T, Yamazaki A, Kurabayashi T *et al.* Familial multicystic dysplastic kidney. *Pediatr Nephrol* 2005; 20: 1200
  81. Sekine T, Namai Y, Yanagisawa A *et al.* A familial case of multicystic dysplastic kidney. *Pediatr Nephrol* 2005; 20: 1245–1248



82. Carta M, Cimador M, Giuffre M *et al.* Unilateral multicystic dysplastic kidney in infants exposed to antiepileptic drugs during pregnancy. *Pediatr Nephrol* 2007; 22: 1054–1057
83. Nicolaides KH, Cheng HH, Abbas A *et al.* Fetal renal defects: associated malformations and chromosomal defects. *Fetal Diagn Ther* 1992; 7: 1–11
84. Kerecuk L, Schreuder MF, Woolf AS. Renal tract malformations: perspectives for nephrologists. *Nat Clin Pract Nephrol* 2008; 4: 312–325
85. Glazebrook KN, McGrath FP, Steele BT. Prenatal compensatory renal growth: documentation with US. *Radiology* 1993; 189: 733–735
86. Hill LM, Nowak A, Hartle R *et al.* Fetal compensatory renal hypertrophy with a unilateral functioning kidney. *Ultrasound Obstet Gynecol* 2000; 15: 191–193
87. Shaheen IS, Watson AR, Broderick N *et al.* Multicystic dysplastic kidney and pelviureteric junction obstruction. *Pediatr Surg Int* 2005; 21: 282–284
88. Coplen DE, Austin PF. Outcome analysis of prenatally detected ureteroceles associated with multicystic dysplasia. *J Urol* 2004; 172: 1637–1639
89. Weizer AZ, Silverstein AD, Auge BK *et al.* Determining the incidence of horseshoe kidney from radiographic data at a single institution. *J Urol* 2003; 170: 1722–1726
90. Borer JG, Glassberg KI, Kassner EG *et al.* Unilateral multicystic dysplasia in 1 component of a horseshoe kidney: case reports and review of the literature. *J Urol* 1994; 152: 1568–1571
91. Gipson TG, Anderson EE, Bradford WD. Multicystic renal dysplasia. Pathologic and clinical observations in 22 cases. *Clin Pediatr (Phila)* 1976; 15: 896–900
92. Walker D, Fennell R, Garin E *et al.* Spectrum of multicystic renal dysplasia: diagnosis and management. *Urology* 1978; 11: 433–436
93. Kleiner B, Filly RA, Mack L *et al.* Multicystic dysplastic kidney: observations of contralateral disease in the fetal population. *Radiology* 1986; 161: 27–29
94. Pedicelli G, Jequier S, Bowen AD *et al.* Multicystic dysplastic kidneys: spontaneous regression demonstrated with US. *Radiology* 1986; 161: 23–26
95. Bachmann H, Winkielman J, Olbing H. Unilateral multicystic kidney dysplasia: follow-up during the first two years of life. *Contrib Nephrol* 1988; 67: 188–192
96. Kullendorff CM. Surgery in unilateral multicystic kidney. *Z Kinderchir* 1990; 45: 235–237
97. Atiyeh B, Husmann D, Baum M. Contralateral renal abnormalities in multicystic–dysplastic kidney disease. *J Pediatr* 1992; 121: 65–67
98. Akl K. Multicystic–dysplastic kidney and contralateral urologic abnormalities. *J Pediatr* 1993; 122: 501
99. Chang WT, Chen HC, Peng HC. The multicystic dysplastic kidney in children. *Zhonghua Yi Xue Za Zhi (Taipei)* 1993; 51: 350–354
100. Flack CE, Bellinger MF. The multicystic dysplastic kidney and contralateral vesicoureteral reflux: protection of the solitary kidney. *J Urol* 1993; 150: 1873–1874
101. Wacksman J, Phipps L. Report of the multicystic kidney registry: preliminary findings. *J Urol* 1993; 150: 1870–1872
102. Han SJ, Yu CY, Liu GC *et al.* Ultrasonographic evaluation of multicystic dysplastic kidney. *Gaoxiong Yi Xue Ke Xue Za Zhi* 1995; 11: 383–389
103. Kaneko K, Suzuki Y, Fukuda Y *et al.* Abnormal contralateral kidney in unilateral multicystic dysplastic kidney disease. *Pediatr Radiol* 1995; 25: 275–277
104. Selzman AA, Elder JS. Contralateral vesicoureteral reflux in children with a multicystic kidney. *J Urol* 1995; 153: 1252–1254
105. Perez LM, Naidu SI, Joseph DB. Outcome and cost analysis of operative versus nonoperative management of neonatal multicystic dysplastic kidneys. *J Urol* 1998; 160: 1207–1211
106. White R, Greenfield SP, Wan J *et al.* Renal growth characteristics in children born with multicystic dysplastic kidneys. *Urology* 1998; 52: 874–877
107. Oliveira EA, Diniz JS, Vilasboas AS *et al.* Multicystic dysplastic kidney detected by fetal sonography: conservative management and follow-up. *Pediatr Surg Int* 2001; 17: 54–57
108. Seeman T, John U, Blahova K *et al.* Ambulatory blood pressure monitoring in children with unilateral multicystic dysplastic kidney. *Eur J Pediatr* 2001; 160: 78–83
109. Abidari JM, Park KH, Kennedy WA *et al.* Serial followup of the contralateral renal size in children with multicystic dysplastic kidney. *J Urol* 2002; 168: 1821–1825
110. Eckoldt F, Woderich R, Wolke S *et al.* Follow-up of unilateral multicystic kidney dysplasia after prenatal diagnosis. *J Matern Fetal Neonatal Med* 2003; 14: 177–186
111. Okada T, Yoshida H, Matsunaga T *et al.* Multicystic dysplastic kidney detected by prenatal ultrasonography: natural history and conservative management. *Pediatr Surg Int* 2003; 19: 207–210
112. Tilemis S, Savanelli A, Baltogiannis D *et al.* Is the risk of hypertension an indication for prophylactic nephrectomy in patients with unilateral multicystic dysplastic kidney? *Scand J Urol Nephrol* 2003; 37: 429–432
113. Kaneyama K, Yamataka A, Satake S *et al.* Associated urologic anomalies in children with solitary kidney. *J Pediatr Surg* 2004; 39: 85–87
114. Kuwertz-Broeking E, Brinkmann OA, Von Lengerke HJ *et al.* Unilateral multicystic dysplastic kidney: experience in children. *BJU Int* 2004; 93: 388–392
115. Ylinen E, Ahonen S, Ala-Houhala M *et al.* Nephrectomy for multicystic dysplastic kidney: if and when? *Urology* 2004; 63: 768–771
116. Al Ghwery S, Al Asmari A. Multicystic dysplastic kidney: conservative management and follow-up. *Ren Fail* 2005; 27: 189–192
117. Guarino N, Casamassima MG, Tadini B *et al.* Natural history of vesicoureteral reflux associated with kidney anomalies. *Urology* 2005; 65: 1208–1211
118. Rahman RC, Amoreo O. Multicystic dysplastic kidney: diagnosis and evolution. *Pediatr Nephrol* 2005; 20: 1023
119. Krzemien G, Roszkowska-Blaim M, Kostro I *et al.* Urological anomalies in children with renal agenesis or multicystic dysplastic kidney. *J Appl Genet* 2006; 47: 171–176
120. Merrot T, Lumenta DB, Tercier S *et al.* Multicystic dysplastic kidney with ipsilateral abnormalities of genitourinary tract: experience in children. *Urology* 2006; 67: 603–607
121. Vu KH, Van Dyck M, Daniels H *et al.* Renal outcome of children with one functioning kidney from birth. A study of 99 patients and a review of the literature. *Eur J Pediatr* 2008; 167: 885–890

Received for publication: 29.8.08; Accepted in revised form: 26.12.08
